1 Divergent evolution of head morphology between marine and  
2 freshwater sticklebacks

3

4 Antoine Fraimout\*<sup>1,2</sup>, Ying Chen<sup>2</sup>, Kerry Reid<sup>2</sup> and Juha Merilä<sup>1,2</sup>

5

6 <sup>1</sup>Ecological Genetics Research Unit, Organismal and Evolutionary Biology Research  
7 Programme, Faculty of Biological and Environmental Sciences, FI-00014 University of  
8 Helsinki, Finland

9 <sup>2</sup>Area of Ecology and Biodiversity, School of Biological Sciences, Kadoorie Biological  
10 Sciences Building, The University of Hong Kong, Pokfulam Road, Hong Kong SAR

11

12 \*Corresponding author: [fraimout.antoine@gmail.com](mailto:fraimout.antoine@gmail.com); [merila@hku.hk](mailto:merila@hku.hk)

13 **Abstract**

14 Intraspecific phenotypic differentiation is of common place occurrence, but the degree to  
15 which it reflects phenotypic plasticity or local adaptation remains often unclear. To be  
16 considered as adaptive, the differentiation must be genetically based and exceed what could  
17 be expected by neutral processes only. Using laboratory reared full-sib family data from  
18 replicate nine-spined stickleback (*Pungitius pungitius*) populations, we show that freshwater  
19 and marine fish display genetically based adaptive differentiation in head size and shape.  
20 Utilising identity-by-descent relationships among full-sibs as estimated with the aid of  
21 molecular markers, we further show that the studied traits are also highly heritable in all  
22 populations indicating and that they can respond to future episodes of natural selection. The  
23 head shape and size of pond fish suggests that observed adaptive differentiation has been  
24 driven by selection favoring limnetic feeding strategy among the pond fish. Analyses of gill-  
25 raker morphology were less conclusive: genetic differentiation was found in gill-raker length  
26 (pond > marine) and number, but the degree of divergence in these traits did not exceed  
27 neutral expectations. Yet, the direction of divergence in gill raker traits are suggestive of the  
28 limnetic feeding mode of pond fish, aligning with the inference from the head morphology  
29 analyses.

30

31 **Keywords:** Geometric morphometrics, adaptation, heritability,  $Q_{ST}$ , quantitative genetics,

32 *Pungitius pungitius*

### 33 **Introduction**

34 Phenotypic differentiation associated with different habitat characteristics is of commonplace  
35 occurrence in both animal (Endler 1978; Foster 1999) and plant (Linhart and Grant 1996;  
36 Bossdorf et al. 2005) kingdoms. Likewise, phenotypic responses to changing environmental  
37 conditions have been frequently reported (Walther et al. 2002; Parmesan 2006; Sheridan &  
38 Bickford 2011), but many studies struggle to disentangle phenotypic plasticity and  
39 genetically based differentiation as the underlying cause for observed differentiation  
40 (Gienapp et al. 2008; Merilä 2012; Merilä & Hendry 2014; Stamp & Hadfield 2020).  
41 Moreover, even if evidence for genetically based differentiation is found, additional evidence  
42 is required to prove that the observed differentiation is adaptive.

43 Common garden studies combined with neutrality tests (e.g., Lande 1976; Rogers 1986;  
44 Spitze 1993; Merilä & Crnokrak 2001) provide a fairly straightforward way to differentiate  
45 adaptive *vs.* non-adaptive causes of phenotypic differentiation (Whitlock 2008; Leinonen et al.  
46 2013; Savolainen et al. 2013). In particular, the neutrality tests implemented in the program  
47 ‘driftsel’ (Karhunen et al. 2013, 2014) provide a statistically powerful approach able to  
48 identify footprints of natural selection even in a fairly small sample of populations  
49 (Ovaskainen et al. 2011). Nevertheless, the driftsel-approach has not become widely used in  
50 studies of population differentiation, possibly because the the field has moved to use genomic  
51 data to identify footprints of natural selection (e.g. Storz 2005; Nosil et al. 2009; Narum &  
52 Hess 2011), and because common garden studies are logistically demanding. While genomic  
53 studies of natural selection appear to provide less laborious paths towards identifying  
54 adaptive differentiation than common garden experiments, they are still grappling with the  
55 problem of false positive tests (Mallick et al. 2009; Bieme et al. 2013; Hoban et al. 2016), as  
56 well as with the difficulty of linking the loci under selection to their phenotypic targets  
57 especially in the case of polygenic traits (McKay & Latta 2002; De Kovel 2006; Le Corre &

58 Kremer 2012). In addition, genome scan approaches become very inefficient in picking up  
59 signals of selection in systems having high background levels of differentiation, such as in  
60 highly subdivided populations experiencing strong drift (Hoban et al. 2016).

61 Variation in fish head shape and jaw structures have been extensively studied as they are  
62 important trophic traits influencing fitness (e.g., Roy et al. 2010; McGee et al. 2013) and even  
63 believed to have spearheaded adaptive radiations (Brouwers 2011; Sallan & Friedman 2012).  
64 While population differences in them have been sometimes shown to be genetically based  
65 (Kimmel et al. 2005; Albert et al. 2008; McGee & Wainwright 2013), there is also evidence  
66 that there is a strong plastic component to variation in head shape and feeding structures  
67 (Troy et al. 1994; Dingemans et al. 2009). Hence, while there are many reports of head and  
68 jaw shape differentiation among fish populations (e.g., Walker and Bell 2000; Tobler et al.  
69 2011 Østbye et al. 2016), few studies have firmly established an adaptive (contra plastic)  
70 basis for this differentiation.

71 Gill-raker morphology constitutes another set of traits that have been extensively studied in  
72 the context of fish foraging ecology (e.g., Berner et al. 2008; Wund et al. 2012; Hosoki et al.  
73 2019). Fish species have adapted to various habitats by evolving unique gill-raker  
74 characteristics that correspond to their specific feeding strategies. As for the case of three-  
75 spined sticklebacks (*Gasterosteus aculeatus*), marine populations typically have more,  
76 closely spaced and longer gill rakers than freshwater populations (Gross and Anderson. 1984;  
77 Leaver et al. 2012; Glazer et al. 2014; Magalhaes et al. 2021), reflecting their limnetic  
78 feeding strategy in marine ecosystems and the benthic feeding strategy in freshwater  
79 ecosystems (Ravinet et al. 2014). However, formal tests of the adaptive basis of this  
80 differentiation are few (but see: Raeymaekers et al. 2007; Seymour et al. 2019).

81 The aim of this study was to test (1) whether pond and marine populations of nine-spined  
82 sticklebacks (*Pungitius pungitius*) differ in head and gill raker morphology and (2) whether  
83 this differentiation exceeds neutral expectations meaning that observed divergence has been  
84 driven by natural selection. To do this, we conducted a common garden experiment and  
85 raised fish from four pond and four marine populations to control for environmental effects  
86 on phenotypes, and subjected the data to driftsel analyses to identify footprints of selection.  
87 The results revealed genetically based phenotypic differentiation in head and gill-raker traits  
88 between marine and pond sticklebacks, and that the differentiation in head traits has been  
89 driven by divergent natural selection.

90

## 91 **Methods**

### 92 *Study populations and sampling*

93 The parental fish used in this study were collected May-June 2018 from four pond (Rytilampi  
94 66.38482°N, 29.31561°E; Pyöreälampi 66.26226°N, 29.42916°E; Kirkasvetinenlampi  
95 66.43673°N, 29.13568°E; Bynastjärnen 64.45416°N, 19.44075°E) and four marine  
96 (Tvärminne 59.83333°N, 23.24900°E; Pori 61.59111°N, 21.47295°E; Raahe 64.68818°N,  
97 24.46189°E; Bölesviken 63.66110°N, 20.20940°E) populations from Fennoscandia using  
98 minnow traps or beach seine (Fig. 1a). The captured adults were transported to aquaculture  
99 facilities of University of Helsinki, and maintained in 1 m<sup>3</sup> flow-through freshwater aquaria  
100 (one per population) until used in artificial fertilisations.

### 101 *Common garden experiments and genotype data*

102 Artificial fertilizations among randomly selected adult fish in breeding condition were  
103 conducted between May 24<sup>th</sup> and July 4<sup>th</sup> 2018. Standard *in vitro* fertilization techniques and  
104 egg rearing methods were applied following Arnott and Barber (2000) and as described in

105 detail in Fraimout *et al.* (2022). In brief, eggs from gravid females were obtained by gently  
106 squeezing their abdomens over a petri dish. Sperm was retrieved from males after they were  
107 over-anesthetized with tricaine methanesulfonate (MS-222) by dissecting the testes and  
108 subsequently mincing them in the same petri dish containing the eggs. Eggs and sperm were  
109 mixed to ensure fertilization and kept in water until hatching. To avoid fungal infections,  
110 water in the petri dishes was changed twice daily and clutches were inspected for signs of  
111 fungal infections or death - dead and infected eggs were removed. At hatching each clutch  
112 was split in two replicate 11 x 10 x 10 cm plastic containers filled with filtered freshwater in  
113 which they were maintained for a four week period during which yolk resorption took place.  
114 The larvae were fed *ad libitum* with live brine shrimp (*Artemia sp. nauplii*). After this, all  
115 replicated families were transferred to Allentown Zebrafish Rack Systems (Aquaneering Inc.,  
116 San Diego, USA). These racks had a closed water circulation system with physical, chemical,  
117 biological and UV filters. The fish in racks were fed for the first four weeks with a mixture of  
118 *Artemia nauplii* and chopped chironomid larvae, and after this, with chopped chironomid  
119 larvae. Part of the water in the rack systems was changed every fortnight to maintain good  
120 water quality. Fish were reared in family groups (maximum five individuals per aquarium) in  
121 racks for a period of ca. 1 year (mean age: 316.4 days) after which the fish were euthanized  
122 with MS-222. Temperature and light conditions were kept constant throughout the  
123 experiment (12:12 LD; 15°C) except during an overwintering period of 3 months (November  
124 – January) when water temperature was lowered to 10°C and light cycle to 5:19 LD.

125 We used data on molecular variation among populations to estimate a neutral baseline for the  
126 tests of selection (see below). Specifically, we obtained genome-wide SNP data for all  
127 individuals using a restriction site-associated DNA (RAD) sequencing technique (2b-RAD;  
128 Wang *et al.*, 2012). Genomic DNA was extracted from fin clips using a standard salting out  
129 protocol (LoperaBarrero *et al.* 2008) and 2b-RAD libraries were built following Momigliano

130 et al (2018) using a slightly modified version of the protocol available online at  
131 [https://github.com/z0on/2bRAD\\_GATK/blob/master/2bRAD\\_protocol\\_may15\\_2017\\_nnrw.p](https://github.com/z0on/2bRAD_GATK/blob/master/2bRAD_protocol_may15_2017_nnrw.pdf)  
132 [df](https://github.com/z0on/2bRAD_GATK/blob/master/2bRAD_protocol_may15_2017_nnrw.pdf)). Briefly, high molecular weight DNA was digested using the *BcgI* enzyme (New England  
133 Biolabs), adaptors were ligated and the fragments amplified via PCR following the protocol  
134 provided in Momigliano *et al.* (2018). Libraries were pooled and the target fragments were  
135 isolated using a BluePippin size selector (Sage Science). Libraries were sequenced using  
136 Illumina technology (HiSeq 4000) at the Beijing Genomic Institute (BGI; Hong-Kong). Raw  
137 reads were demultiplexed and mapped to the *P. pungitius* genome (v.6; Varadharajan *et al.*  
138 2019) using bowtie2 (Langmead and Salzberg, 2012). We used samtools (v.1.10; Li *et al.*  
139 2009) to convert SAM files to BAM files.

140 We also used SNP-data to identify sex of all F<sub>1</sub> offspring, as they were measured before  
141 reaching sexual maturity. From the genotype data file, we used the *snpRelate* R package  
142 (Zheng *et al.* 2012) to perform a Principal Component Analysis (PCA) based on all markers  
143 located on the sex chromosome (Linkage group 12; Natri *et al.* 2019) and assigned sex to the  
144 F<sub>1</sub> individuals according to their clustering with the parental individuals of known sex.  
145 Finally, we pruned the dataset from markers in high linkage disequilibrium (LD) using the  
146 *snpGdsLDpruning* function of the *snpRelate* package and retained only markers with LD <  
147 0.8 and a minimum allele frequency (MAF) > 0.05 and removed all sex-linked SNPs. This  
148 resulted in a total of 2,660 informative SNPs.

149

### 150 *Analyses of head size and shape*

151 We quantified variation in head size and shape among the study populations following a  
152 landmark-based geometric morphometrics approach (Bookstein 1991). A total of 32  
153 landmarks (see Fig. 1b for details) and semi-landmarks were digitized from the left side of

154 individuals from digital images using the tpsDig2.1 software (Rohlf 2006). Specifically, 4  
155 fixed landmarks were placed as in Yang *et al.* (2016) at: the posterior extent of the  
156 supraoccipital (landmark 1; Fig. 1b), the anterior insertion of the premaxilla (landmark 2; Fig.  
157 1b), the anterior-ventral extent of the preopercular (landmark 3; Fig. 1b) and the ventral  
158 extent of the preopercular bone (landmark 4; Fig. 1b). Semilandmarks were placed by  
159 resampling a total of 30 points along an outline starting from landmark 1 and ending on  
160 landmark 4 describing head shape using the ‘draw curves’ mode in tpsDig. To avoid  
161 redundancy the first and last semi landmarks (overlapping with fixed landmarks 1 and 4)  
162 were removed prior to analyses. All subsequent morphometric analyses from the obtained  
163 landmark configuration were performed in R using the *geomorph* package (v.4.0.1; Adams *et*  
164 *al.* 2013). First, we used the plotOutliers function in geomorph to identify outlier individuals  
165 based on their Procrustes distance from the mean head shape of the samples. We removed 16  
166 individuals outside the upper quartile range and retained a total of 425 individuals for  
167 subsequent head shape analyses. Landmarks were superimposed following the Procrustes  
168 generalized least square superimposition (Dryden & Maria 1992) and semi-landmarks were  
169 slid to the mean shape configuration and their position optimized using Procrustes distance  
170 by setting the *ProcD* option of the *gpagen* function to “TRUE” in geomorph. Head centroid  
171 size obtained from the Procrustes alignment was used as measurement for head size in all  
172 subsequent analyses. For head shape, we performed a PCA on the procrustes coordinates  
173 using the *gm.prcomp* function. The non-null principal components (PC) describing shape  
174 variation were used as shape data in the subsequent analyses and standardized for allometric  
175 variation (Rolshausen *et al.* 2015). Specifically, we followed the allometric approach of  
176 Leonart *et al.* (2000) where the standardized trait measurement  $PC_S$  is defined such that:

177 
$$PC_S = PC_0 (HS_m / HS_0)^b \quad (1)$$



178 where  $PC_0$  is the original (i.e., unstandardized) trait measurement,  $HS_M$  is the mean head  
179 centroid size per population;  $HS_0$  is the head centroid size of each individual and  $b$  is the  
180 population-specific coefficient of within-slope regression of head centroid size on the focal  
181 PC.

182 We tested for population and sex differences for head size and shape using procrustes  
183 analyses of variance as implemented in the *geomorph* package. Differences in head centroid  
184 sizes were tested using the *procD.lm* function and fitting a model including body length, sex,  
185 habitat and population as explanatory variables. Similarly, we tested for differences in head  
186 shape by fitting a model including log-transformed head centroid size, sex, habitat and  
187 population as explanatory variables. We further tested for differentiation in head shape data  
188 using multivariate analysis of variance (MANOVA) based on the standardized PC described  
189 above.

190

### 191 *Analyses of gill raker number and size*

192 Gill raker traits were measured from a total of 126 individuals from 64 families across eight  
193 populations — four pond ( $n=51$ ) and four marine ( $n=75$ ) populations. These samples  
194 included 62 wild-caught individuals and 64 of their laboratory-raised  $F_1$  generation offspring,  
195 comprising 32 females, 92 males, and two individuals of unknown sex.

196 Four gill raker traits were measured: number of gill rakers, length, width, and spacing  
197 between rakers. The number of gill rakers were counted on the left side of the first gill arch  
198 unless the left gill rakers were damaged, in which case the right side counts were used instead.  
199 As the dorsal arch is prone to damage during dissection, only gill rakers on the ventral arch  
200 were counted. We measured the length and width of the longest gill raker along the arch, and

201 defined spacing as the center-to-center spacing between the base of a pair of adjacent rakers,  
202 specifically between the longest raker and the adjacent one on the upper side (Fig. 1c).

203 To ensure high repeatability of the measurements, we followed the laboratory protocol of  
204 Nicholas and Craig (2016). In summary, we first dissected the first branchial gill arch,  
205 digested it in a 10% Potassium Hydroxide (KOH) solution for two hours, and stained it with  
206 0.008% Alizarin Red S in 1% KOH in water for at least two hours, as the staining time varies  
207 depending on the gill arch size. We then rinsed the raker to remove excess stain, placed the  
208 specimen in 89% glycerol, and flat-mounted the skeleton on bridged cover slips.  
209 Measurements were obtained using digital images taken with a fluorescent stereomicroscope  
210 equipped with an Olympus SZX16 or a Nikon FI3 camera. Length-related measurements  
211 were accurate to the nearest 0.01 mm using ImageJ software v. 1.51 (Schneider et al. 2012).  
212 To validate the measurement data, we independently measured the same set of traits for 20%  
213 of randomly selected samples and calculated the repeatability (Nakagawa and Schielzeth,  
214 2010). The repeatability of these traits from two independent measurements ranged from  
215 0.855 to 0.967 ( $p < 0.001$ ), indicating a high level of precision in the measured traits.

216 As body size (standard length) varied between habitats and sexes, we size-standardized all  
217 linear gill raker traits prior to statistical analysis. This was done by constructing linear mixed  
218 effect models, incorporating habitat and sex as fixed factors and population and pedigree  
219 information as random factors, to determine if marine and pond populations differed in mean  
220 values of gill raker traits and whether these traits displayed sexual dimorphism. This analysis  
221 was performed using the 'mmer' function in the 'sommer' R package (Giovanny, 2016) using  
222 R version 4.2.2 (R Core Team, 2022).

223

224 *Tests of natural selection*

225 To test whether observed population differentiation in morphology exceeded neutral  
226 expectations, the approach of Ovaskainen et al. (2011) as implemented in the R packages  
227 *driftsel* and *rafm* (Karhunen *et al.* 2013) was adopted. We followed the workflow from  
228 Karhunen *et al.* (2013) and first estimated the matrix of population-level coancestry from  
229 genomic data. Due to the computational burden of the MCMC-based algorithm, we sampled  
230 2000 random markers from the pruned SNP dataset (Li *et al.* 2019) which were used as input  
231 for the *do.all* function of the *rafm* package. We ran the model for 15,000 MCMC iterations  
232 with a burn-in period of 5000 and sampling every 10th iteration. The resulting coancestry  
233 matrix was then used as a neutral baseline for the *driftsel* analysis. We ran the *MH* function of  
234 the *driftsel* package using the posterior samples of the coancestry matrix as prior information  
235 and used either head centroid size or the three first size-standardized-PC most representative  
236 of habitat shape variation as input traits. Sex of the individuals was used as covariate and  
237 body length was added as covariate for the model using head centroid size only. We  
238 subsequently used the *S.test* and *H.test* functions to calculate the *S* and *H* statistics,  
239 respectively, as indicators of signal of selection. The rationale behind each statistic is similar  
240 to that of classical  $Q_{ST}$ - $F_{ST}$  comparisons with values of *S* or *H* > 0.95 indicating signal of  
241 divergent selection, values equal to 0.5 indicates a scenario compatible with neutral evolution  
242 and values < 0.05 imply stabilizing selection. Contrary to the *S.test*, the *H.test* allows to  
243 incorporate habitat information into the *driftsel* framework to test whether habitat similarity  
244 correlates with phenotypic similarity among populations (Karhunen *et al.* 2014).

245 To verify the robustness of the selection test results, we also applied the method of Martin *et*  
246 *al.* (2008) to our genetic and phenotypic data. This method is a multivariate approach to the  
247  $Q_{ST}$ - $F_{ST}$  comparison and tests for proportionality between the genetic (co)variance matrix (**G**)  
248 and the among-population divergence (**D**). Under a scenario of purely neutral evolution, the  
249 proportionality between **G** and **D** is defined as:

$$250 \quad \mathbf{D} = 2F_{ST} / (1 - F_{ST}) \mathbf{G} \quad (2)$$

251 where  $F_{ST}$  is estimated from putatively neutral molecular markers (Lande 1979, Lofsvold  
252 1988, Marroig and Cheverud, 2004, McGuigan et al 2005, Martin et al. 2008, Berner et al  
253 2010). We applied the framework of Martin *et al.* (2008) to calculate the coefficient of  
254 proportionality  $\rho_{ST}$  between  $\mathbf{D}$  and  $\mathbf{G}$ , and compared it to the value of  $2F_{ST} / (1 - F_{ST})$  obtained  
255 from the pruned SNP dataset. The rationale behind this test is that values of  $\rho_{ST} > 2F_{ST} / (1 -$   
256  $F_{ST})$  would indicate a signal divergent selection. We used the *pairwise.prop* R function of the  
257 *neutrality* package from Martin et al. (2008) to calculate  $\rho_{ST}$  and the *hierfstat* R package  
258 (v.0.5.11; Goudet & Jombart 2022) to get bootstrapped estimates of  $F_{ST}$  from neutral loci.  
259 Statistical difference between  $\rho$  and  $2F_{ST} / (1 - F_{ST})$  was assessed based on the overlapping of  
260 confidence intervals around the two estimates.

261

### 262 ***Heritability of head morphology***

263 We estimated the heritability of head shape variation using animal models under a Bayesian  
264 framework using the MCMCglmm R package (Hadfield 2010). We partitioned the  
265 phenotypic variance  $V_P$  of head shape into its additive  $V_A$  genetic component and estimated  
266 heritability as  $h^2 = V_A / V_P$ . For each population, we fitted a model including the first PC (PC1)  
267 describing habitat variation in head as a response variable and added head centroid size as  
268 covariate and sex of the individuals as fixed effect. We used the same approach to estimate  $h^2$   
269 of head centroid size using sex of the individuals as a fixed effect. For both models, to  
270 account for actual relatedness among individuals in each population, we appended the  
271 Genomic Relationship Matrix (GRM) estimated from SNP data as a random effect in the  
272 model. The GRM was estimated from the pruned SNP data using the *G.matrix* function of the  
273 *snpReady* R package (Granatto *et al.* 2018). Each model was run with 303000 MCMC

274 iteration with a burn-in period of 3000 and sampling every 100<sup>th</sup> iteration. Model checking  
275 was performed by visually inspecting the trace plots of the MCMC chains and by inspecting  
276 the effect sizes of variance components using the *effecSize* function of the *coda* R package  
277 (Plummer *et al.* 2006). All  $h^2$  values are reported as the median of the posterior samples along  
278 with their 95% Highest Posterior Density (HPD) intervals.

279

## 280 **Results**

281

### 282 ***Population differentiation in head morphology***

283 We found significant effects of sex, population of origin and habitat on head centroid size  
284 (Table 1). Freshwater fish had larger heads than marine fish (Fig. 2a) and head centroid size  
285 varied to a greater extent among pond than among marine populations (Fig. S1). Comparison  
286 between sexes revealed sexual dimorphism in head centroid size, males having bigger  
287 relative head centroid size than females (Fig. 2a). We also found differences in head shape  
288 among habitats with the first PC of shape variation discriminating between pond and marine  
289 individuals (Fig. 2b). This difference was reflected by a significant habitat effect in the  
290 procrustes Anova on head shape ( $p < 0.001$ , Table 2).

291

### 292 ***Population differentiation in gill raker traits***

293 Individuals from pond populations were larger than those from marine populations ( $X_{\text{pond}} =$   
294  $53.39 \pm 2.39$  [S.E.] mm,  $X_{\text{marine}} = 42.78 \pm 1.12$  mm;  $F_{1,124} = 27.75$ ,  $p < 0.001$ ), and females  
295 were bigger than males ( $X_{\text{females}} = 57.16 \pm 2.52$  mm;  $X_{\text{males}} = 43.20 \pm 1.23$  mm;  $F_{1,123} = 51.79$ ,  
296  $p < 0.001$ ). Marine and pond populations differed significantly in both the number ( $X_{\text{pond}} =$

297  $9.94 \pm 0.13$ ;  $X_{\text{marine}} = 8.59 \pm 0.08$ ;  $t_{3.02} = 5.572$ ,  $p = 0.01$ ) and length ( $X_{\text{pond}} = 1.45 \pm 0.04$  mm;  
298  $X_{\text{marine}} = 1.09 \pm 0.02$  mm;  $t_{5.91} = 2.630$ ,  $p = 0.039$ ) of gill rakers, as did the sexes ( $X_{\text{females}} =$   
299  $9.11 \pm 0.20$ ;  $X_{\text{males}} = 9.14 \pm 0.10$ ;  $t_{122.79} = 2.794$ ,  $p = 0.006$ ) for number and ( $X_{\text{females}} = 1.31 \pm$   
300  $0.06$  mm;  $X_{\text{males}} = 1.21 \pm 0.03$  mm;  $t_{119.68} = 4.549$ ,  $p < 0.001$ ) for length. Sticklebacks from  
301 pond populations had more and longer rakers (Fig. 3), and males possessed shorter rakers for  
302 their size relative to females. However, no significant differences were observed in the width  
303 or spacing of rakers across habitats or sexes ( $p > 0.05$  in all tests).

304

### 305 *Tests of selection*

306 The three first PCs from the PCA of size-standardized-PC of shape variation were used as  
307 input for driftsel which revealed a signal of divergent selection ( $S = 0.953$  and  $H = 0.993$ ; Fig.  
308 4). All populations from both habitats were indicated to have diverged more than expected by  
309 chance from their common ancestor (Fig. 4). The direction of divergence differed  
310 consistently for marine and pond populations, with the exception one pond population (KRK;  
311 Fig. 4b). Individuals from this population had an intermediate head morphology compared to  
312 other populations and were not significantly different from the reconstructed ancestral  
313 population (Fig. 4). We found similar results when analyzing head centroid size differentiation  
314 with  $S = 0.978$  and  $H = 1$ .

315

316 The multivariate  $Q_{\text{ST}}-F_{\text{ST}}$  approach indicated that the proportionality coefficient  $\rho$  was higher  
317 than  $2F_{\text{ST}}/(1-F_{\text{ST}})$  obtained from neutral markers ( $\rho_{\text{ST}} = 1.8$  [1.1; 5.3];  $2F_{\text{ST}}/(1-F_{\text{ST}}) = 0.828$   
318 [0.766; 0.890]), thus indicating a signal of divergent selection for head shape. Neither  $X^2$  or  
319 Bartlett-corrected  $X^2$  test rejected the null hypothesis of proportionality between **D** and **G** ( $p$   
320  $= 0.07$ ;  $p=0.159$ , respectively) thus indicating that both matrices are proportional.

321

322 We did not find evidence for diversifying natural selection for any gill raker trait ( $S = 0.58$ ,  $H$   
323  $= 0.86$  for the univariate model for raker number;  $S = 0.69$ ,  $H = 0.89$  for length;  $S = 0.49$ ,  $H =$   
324  $0.62$  for width; and  $S = 0.54$ ,  $H = 0.74$  for gap), suggesting that pond and marine populations  
325 have not evolved significantly further away from the ancestral mean than would be expected  
326 under neutrality. The same conclusion was reached combining all four gill raker traits in a  
327 multivariate analysis ( $S = 0.55$ ;  $H = 0.91$ ). This was also confirmed by the proportionality  
328 coefficient ( $p_{ST} = 0.33$  [0.21; 0.80]) being not significantly higher than  $2F_{ST} / (1 - F_{ST})$  of 0.828  
329 [0.766; 0.890].

330

### 331 *Heritability of head size and shape*

332 We found moderate to high  $h^2$  values for head shape and size in all populations (Table 3).  
333 Estimates for different populations were not significantly different as indicated by the  
334 overlapping 95% HPD intervals (Table 3).

335

### 336 **Discussion**

337 The results revealed consistent differences in head and gill-raker morphology between marine  
338 and pond populations of nine-spined sticklebacks reared in common garden conditions. This  
339 together with the results of the selection tests provide firm evidence that the genetically based  
340 differentiation in head size and shape (but not in gill-raker morphology) has been driven by  
341 divergent natural selection favouring different head morphology in marine and pond habitats.  
342 Since the studied pond populations have evolved independently in total isolation since their  
343 colonisation after the last glaciation (Herczeg et al. 2009; Shikano et al. 2010), the results  
344 also provide strong evidence for parallel phenotypic evolution in head morphology: random  
345 processes are not expected to result in evolution of similar morphologies in different

346 localities (Schluter 2000). However, even if the heritabilities of head traits were similar in  
347 different populations, the question whether the genetic underpinnings of the similar head  
348 morphology in different pond populations are underlied by the same or different genetic loci  
349 remains to be investigated. Earlier studies of other traits in these populations suggest that the  
350 similar phenotypic outcomes have been the result of recruitment of different genetic loci to  
351 underlie similar phenotypic adaptations (Kemppainen et al. 2021; Fraimout et al. 2022; Yi et  
352 al. 2023). In the following sections, we discuss how the results advance our understanding of  
353 local adaptation in general, and that of sticklebacks in particular.

354 The driftsel approach circumvents many shortcomings associated with traditional  $Q_{ST}$ - $F_{ST}$   
355 approaches aiming to test whether trait differentiation among populations exceeds that to be  
356 expected due to stochastic processes alone (Karhunen et al. 2013). Here, it provided evidence  
357 for adaptive nature of head size and shape differentiation among pond and marine stickleback  
358 populations. As such, the results align with earlier evidence for adaptive differentiation  
359 among the studied pond and marine populations (e.g. Herczeg et al. 2009; Ab Ghani et al.  
360 2013; Karhunen et al. 2014; Fraimout et al. 2022). Particularly noteworthy is that despite the  
361 high degree of background differentiation (mean  $F_{ST} = 0.286$  across all populations) in our  
362 data, driftsel was able to pick up a signal of divergent natural selection. The approach of  
363 Martin *et al.* (2008) also suggested that differentiation in head shape was greater than the  
364 neutral expectation but that the magnitude of divergence was moderate. Nevertheless, it is  
365 conceivable that attempts to achieve the same with any  $F_{ST}$  outlier tests in data with this high  
366 neutral background level of differentiation would likely fail (e.g., Hoban et al. 2016; Liet al.  
367 2019). Besides, as pointed out by Bierne *et al.* (2013), outlier tests are not expected to work  
368 well when genetic architecture of local adaptation has a polygenic basis, as is likely to be the  
369 case for most quantitative traits of ecological interest.



370 While the differences in head size and shape were very clear and consistent between marine  
371 and freshwater populations, the driftsel analysis revealed one anomaly: head traits in one of  
372 the pond populations (KRK) seemed to diverge in an orthogonal direction from marine and  
373 pond populations. While it might be tempting to ascribe such a deviation to random genetic  
374 drift from the hypothetical ancestor, it is also possible that there might be a biological  
375 explanation for this. Namely, in earlier analyses of behavioural differences between the same  
376 marine and freshwater populations, the KRK population showed a similar deviation in  
377 response to predation risk by piscine predators (Framout et al. 2021). What differentiates the  
378 KRK population from other studied pond populations is that it has a history of artificial  
379 introduction of brown trout (*Salmo trutta*) to this locality (Herczeg et al. 2009, 2010). Hence,  
380 while sticklebacks from the three other pond populations have evolved in absence of piscine  
381 predators since the ponds became isolated, the fish in KRK have been faced with recent  
382 brown trout predation. Hence, it is conceivable that this might have selected their behaviour  
383 and head morphology to converge back towards that of marine ancestors. Nonetheless, no  
384 piscine predators were observed in the field at the time of sampling and further studies should  
385 investigate the link between predation pressure and head shape morphology in *P. pungitius*.

386 While the evidence for adaptive differentiation in head size and shape was clear-cut, the  
387 results regarding the gill-raker morphology were not. We observed significant genetically  
388 based differentiation in gill-raker number and length between pond and marine fish, this  
389 differentiation did not exceed neutral expectations. This result does not exclude the  
390 possibility that natural selection could be behind the observed differentiation, only that  
391 statistical evidence for this is lacking. The consistent results for head gill-raker traits  
392 confirmed that the pond fish have evolved to become better suited for feeding on planktonic  
393 prey (longer snouts, upturned jaws, more and longer rakers) and marine fish better at feeding  
394 benthic prey with a blunt head, short snouts, fewer and shorter rakers. While this might at the

395 first sight seem counterintuitive and go against expectations grounded on the work done in  
396 the related three-spined stickleback in which freshwater fish have benthic like heads and gill-  
397 rakers and marine fish limnetic like heads and gill-rakers (Rundle et al. 2003; Reimchen and  
398 Nosil, 2006; Raeymaekers et al. 2007), one has to keep in mind that there are subtle  
399 differences in ecologies of the three- and nine-spined stickleback species (Merila 2013).  
400 Specifically, the lack of piscine predators in isolated ponds opens up the pelagic niche for  
401 nine-spined sticklebacks (Karlsson & Byström 2005) and could favor development of more  
402 numerous and longer gill-rakers. Conversely, marine nine-spined sticklebacks (and those  
403 living in large lakes with predatory fish) living with piscine predators differ from three-  
404 spined sticklebacks in that they are not as gregarious as three-spined sticklebacks and tend to  
405 hide and feed in protection vegetation. Hence, the lack of marine three-spined stickleback-  
406 like gill-raker morphology in marine nine-spined sticklebacks makes sense if they rely less on  
407 planktonic diet and feed more benthically compared to syntopic three-spined sticklebacks.

408 What would be the selective advantage of the large head with strongly upward protruding jaw  
409 for pond sticklebacks? In absence of data on diet composition and/or trophic positioning data  
410 derived from stable isotopes from the study populations, we can only speculate to this effect.  
411 In the absence of native predatory fish, sticklebacks colonising freshwater habitats tend to  
412 evolve large heads with strongly upward protruding jaws (Walker & Bell 2000; Bell &  
413 Aguirre 2013; but see: Voje et al. 2013; Østbye et al. 2016). Such head morphology is  
414 thought be an adaptation to feed on limnetic diets and improved feeding performance on  
415 zooplankton (Lavin & McPhail 1986; Walker & Bell 2000). On the other hand, the head  
416 shapes of freshwater three-spined sticklebacks feeding primarily either on a limnetic or  
417 benthic diet (Wootton 1984; Gow et al. 2007) resemble closely those of pond and marine  
418 nine-spined sticklebacks, respectively. This could indicate that pond nine-spined sticklebacks  
419 released from predation pressure from piscine predators have shifted their diet towards

420 feeding more zooplankton. Data from one of our study ponds (Rytilampi) indicates that  
421 although sticklebacks in this pond tend to feed mostly benthic prey, they do also consume  
422 pelagic zooplankton (Merilä & Eloranta 2017). Furthermore, data from Swedish lakes with  
423 predatory fish show that large nine-spined sticklebacks tend to be more planktivorous than  
424 their smaller conspecifics as they experience reduced predation risk in the pelagic open-water  
425 areas (Karlsson & Byström, 2005). The results of the analyses of gill-raker morphology align  
426 with these inferences: pond sticklebacks had long gill-rakers typical for fish adapted on  
427 feeding zooplankton, whereas marine ones had gill-rakers typical for benthivorous fish  
428 (Ingram et al. 2012). Hence, while the information gleaned from literature gill-rakers  
429 suggests that the observed divergence - clearly driven by divergent natural selection - is likely  
430 associated with differences in food acquisition, further studies looking into diets and feeding  
431 modes are needed to establish this firmly. Nevertheless, what is clear is that the observed  
432 divergence in head morphology cannot be explained by neutral process or phenotypic  
433 plasticity, and that the observed differences are not subtle, but apparent also for the naked eye  
434 (Fig.1b) and corresponding to substantial differences with large effect sizes.

435 The results further confirm that not only are freshwater stickleback populations adapted to  
436 their respective habitats, but also possess ample heritable variation in both relative head size  
437 and shape. Heritability estimates were fairly similar for marine and pond populations,  
438 suggesting that the latter have not suffered from massive loss of adaptive variation in spite of  
439 having lost significant amounts of neutral genetic variation due to population size bottlenecks  
440 and drift (Shikano et al. 2010; Kivikoski et al. 2023). Although these heritability estimates  
441 derive from full-sib analyses and hence potentially include maternal effect and dominance  
442 variance, earlier analyses of body size variation from two of these populations suggest that  
443 maternal effects dissipate quickly (Shimada et al. 2011) and there are no quantifiable  
444 dominance effects (Ab Ghani et al. 2012; Fraimout et al. 2021). Hence, we conclude that

445 head size and shape are heritable, and hence able to respond to natural selection in all studied  
446 populations also in future.

447 Finally, although the mean head size and shape differed between marine and pond  
448 populations, one should note that there was also some degree of overlap among pond and  
449 marine populations, and heterogeneity in mean values of these variables as for instance  
450 reflected in variance in the degree that the different ponds were indicated to have diverged  
451 from the reconstructed ancestral form. This is not surprising given that freshwater habitats are  
452 heterogenous ecosystems in terms of their biotic and abiotic conditions and therefore, the  
453 direction and strength of natural selection on phenotypic traits are unlikely to be equal in all  
454 ponds. In fact, this kind of heterogeneity in mean trait values in replicate freshwater  
455 populations of sticklebacks has been seen also in earlier studies (e.g., Kaeuffer et al. 2012;  
456 Østbye et al. 2016).

457 In line with earlier results (Herczeg et al. 2010), we observed strong sexual dimorphism in  
458 head size and shape, males having larger differently shaped heads than females. While this  
459 might be indicative of niche partitioning among the sexes, it is also possible that sex  
460 differences are related to different sex roles. Nine-spined sticklebacks males use their jaws to  
461 build nests into which females lay their eggs, and males also defend their nests and hatchling  
462 offspring with their mouths (Wootton 1984). The degree of divergence among the two sexes  
463 was less compared to that among habitats - this may suggest that strength of habitat  
464 associated selection exceeds that of sex-specific selection.

465

## 466 ***Conclusions***

467 To sum up, the results provide evidence for adaptive divergence in head size and shape  
468 between pond and marine nine-spined sticklebacks, as well as genetically based divergence in

469 gill-raker length and number. However, we failed to find evidence to indicate that the latter  
470 differentiation has been driven by natural selection. We further show the male and female  
471 sticklebacks display pronounced sexual dimorphism in head size and shape, and that further  
472 studies would be needed to understand the functional significance of this dimorphism. The  
473 result further suggests moderate to high heritability of relative head size and head shape  
474 suggesting that these traits have high potential to evolve in response to natural selection also  
475 in future.

476

#### 477 **Ethical statement**

478 All experiments were conducted under a permit from the Animal Experiment Board in  
479 Finland (permit reference ESAVI/4979/2018). Permission to collect fish from PYO, KRK  
480 and RYT ponds was obtained from Metsähallitus (license # MH794/2018). Authorisation to  
481 catch fish from the marine populations was provided with personal National Fishing Licenses.

#### 482 **Data Availability**

483 The raw data underlying this article including pictures, TPS files and genotype data will be  
484 made available in the Dryad Digital Repository. R scripts to replicate all analyses are publicly  
485 available at: <https://github.com/afraimout/>

#### 486 **Author contributions**

487 J.M. and A.F. conceived and designed the research. A.F. conducted field work and collected  
488 field samples. A.F. and Y.C. performed wet lab and data analyses. J.M. and A.F. led the  
489 writing effort, K.R. and Y.C. provided input and reviewed the manuscript.

490

491 **Acknowledgements**

492 We thank Jacquelin DeFaveri, Niko Björkell, Karlina Ozolina, Niina Nurmi, and  
493 Miinastiina Issakainen for their help in sampling and rearing sticklebacks. M. Issakainen also  
494 helped with DNA extractions. LEE Jae Hyun kindly drew the gill raker diagram. We thank  
495 Michael Bell for guidance on staining and measuring gill rakers. Our research was funded by  
496 the Academy of Finland (grant # 218343 to JM). The authors have no conflict of interest to  
497 declare.

498

499 **References**

- 500 Ab Ghani, N.I., G. Herczeg, and J. Merilä. 2012. Body size divergence in nine-spined  
501 sticklebacks: disentangling additive genetic and maternal effects. *Biological Journal of the*  
502 *Linnean Society* 107(3):521-528.
- 503 Ab Ghani, I.N., G. Herczeg, T. Leinonen, and J. Merilä. 2013. Evidence for genetic  
504 differentiation in timing of maturation among nine-spined stickleback populations. *Journal of*  
505 *Evolutionary Biology* 26:775-782.
- 506 Adams, D. C., and E. Otárola-Castillo, 2013. geomorph: an R package for the collection and  
507 analysis of geometric morphometric shape data. *Methods in ecology and evolution*, 4(4): 393-  
508 399.
- 509 Albert, A.Y., S. Sawaya, T.H. Vines, A.K. Knecht, C.T. Miller, B.R. Summers, S.  
510 Balabhadra, D.M. Kingsley, and D. Schluter. 2008. The genetics of adaptive shape shift in  
511 stickleback: pleiotropy and effect size. *Evolution* 62(1):76-85.

- 512 Arnott, S., and I. Barber. 2000. Split-clutch IVF: a technique to examine indirect fitness  
513 consequences of mate preferences in sticklebacks. *Behaviour* 137(7-8):1129-1140.
- 514 Bates, D., Maechler, M., Bolker, B., & Walker, S. 2015. Fitting linear mixed-effects models  
515 using lme4. *J. Stat. Softw.*, 67(1): 1-48.
- 516 Bell, M.A. and W.E. Aguirre. 2013. Contemporary evolution, allelic recycling, and adaptive  
517 radiation of the threespine stickleback. *Evolutionary Ecology Research* 15(4):377-411.
- 518 Berner, D., D.C. Adams, A.C. Grandchamp, and A.P. Hendry. 2008. Natural selection drives  
519 patterns of lake–stream divergence in stickleback foraging morphology. *Journal of*  
520 *Evolutionary Biology* 21(6):1653-1665.
- 521 Bierne, N., D. Roze, and J.J. Welch. 2013. Pervasive selection or is it...? Why are  $F_{ST}$   
522 outliers sometimes so frequent? *Molecular Ecology* 22:2061-2064.
- 523 Bookstein, F.L. 1991. *Morphometric Tools for Landmark Data: Geometry and Biology*. New  
524 York: Cambridge University Press.
- 525 Bossdorf, O., H. Auge, L. Lafuma, W.E. Rogers, E. Siemann, and D. Prati. 2005. Phenotypic  
526 and genetic differentiation between native and introduced plant populations. *Oecologia*  
527 144(1):1-11.
- 528 Brouwers, L. 2011. Heads before tails: Ancient fish evolved head-first. *Scientific*  
529 *American*. [https://blogs.scientificamerican.com/thoughtomics/heads-before-tails-ancient-fish-](https://blogs.scientificamerican.com/thoughtomics/heads-before-tails-ancient-fish-evolved-head-first/)  
530 [evolved-head-first/](https://blogs.scientificamerican.com/thoughtomics/heads-before-tails-ancient-fish-evolved-head-first/)
- 531 Cohen, J. 1988. *Statistical power analysis for the behavioral sciences*. 2nd edn. Mahwah, NJ:  
532 Lawrence Erlbaum Associates.
- 533 Covarrubias-Pazaran, G. 2016. Genome-assisted prediction of quantitative traits using the R  
534 package sommer. *PLoS One* 11(6):e0156744.

- 535 Day, T., J. Pritchard, and D. Schluter. 1994. A comparison of two sticklebacks. *Evolution*  
536 48(5):1723-1734.
- 537 DeFaveri, J., T. Shikano, and J. Merilä. 2014. Geographic variation in age structure and  
538 longevity in the nine-spined stickleback (*Pungitius pungitius*). *PLoS One* 9(7):e102660.
- 539 De Kovel, C.G.F. 2006. The power of allele frequency comparisons to detect the footprint of  
540 selection in natural and experimental situations. *Genetics Selection and Evolution* 38:3-23.
- 541 Dingemanse, N.J., C. Oosterhof, F. Van Der Plas, and I. Barber. 2009. Variation in  
542 stickleback head morphology associated with parasite infection. *Biological Journal of the*  
543 *Linnean Society* 96(4):759-768.
- 544 Dryden, I.L., and K.V. Mardia. 1992. Size and shape analysis of landmark data. *Biometrika*  
545 79(1):57-68.
- 546 Ellis, N.A., and C.T. Miller. 2016. Dissection and flat-mounting of the threespine stickleback  
547 branchial skeleton. *JoVE (Journal of Visualized Experiments)* 111:e54056.
- 548 Endler. 1978. *Geographic Variation, Speciation and Clines*. Yale Univ Press.
- 549 Foster, S.A. 1999. The geography of behaviour: an evolutionary perspective. *Trends in*  
550 *Ecology and Evolution* 14(5):190-195.
- 551 Fraimout, A., Z. Li, M.J. Sillanpää, P. Rastas, and J. Merilä. 2021. Dissecting the genetic  
552 architecture of quantitative traits using genome-wide identity-by-descent sharing among full-  
553 sibs. *bioRxiv*. <https://doi.org/10.1101/2021.03.01.432833>
- 554 Glazer, A.M., P.A. Cleves, P.A. Erickson, A.Y. Lam, and C.T. Miller. 2014. Parallel  
555 developmental genetic features underlie stickleback gill raker evolution. *Evodevo* 5(1):1-16.



- 556 Gienapp, P., C. Teplitsky, J.S. Alho, J.A. Mills, and J. Merilä. 2008. Climate change and  
557 evolution: disentangling environmental and genetic responses. *Molecular Ecology* 17(1):167-  
558 178.
- 559 Gow, J.L., C.L. Peichel, and E.B. Taylor. 2007. Ecological selection against hybrids in  
560 natural populations of sympatric threespine sticklebacks. *Journal of Evolutionary Biology*  
561 20:2173-2180.
- 562 Gross, H.P., and J.M. Anderson. 1984. Geographic variation in the gillrakers and diet of  
563 European threespine sticklebacks, *Gasterosteus aculeatus*. *Copeia* 1984(1):87-97.
- 564 Gunz, P., and P. Mitteroecker. 2013. Semilandmarks: a method for quantifying curves and  
565 surfaces. *Hystrix, the Italian Journal of Mammalogy* 24(1):103-109.
- 566 Herczeg, G., A. Gonda, and J. Merilä. 2009. Evolution of gigantism in nine-spined  
567 sticklebacks. *Evolution* 63(12):3190-3200.
- 568 Herczeg, G., M. Turtiainen, and J. Merilä. 2010. Morphological divergence of North-  
569 European nine-spined sticklebacks (*Pungitius pungitius*): signatures of parallel evolution.  
570 *Biological Journal of the Linnean Society* 101(2):403-416.
- 571 Hoban, S., J.L. Kelley, K.E. Lotterhos, M.F. Antolin, G. Bradburd, D.B. Lowry, M.L. Poss,  
572 L.K. Reed, A. Storfer, and M.C. Whitlock. 2016. Finding the genomic basis of local  
573 adaptation: pitfalls, practical solutions, and future directions. *American Naturalist*  
574 188(4):379-397.
- 575 Hosoki, T., S. Mori, S. Nishida, M. Kume, T. Sumi, and J. Kitano. 2019. Diversity of gill  
576 raker number and diets among stickleback populations in novel habitats created by the 2011  
577 Tōhoku earthquake and tsunami. *Evolutionary Ecology Research* 20(2):213-230.

- 578 Ingram, T., R. Svanbäck, N.J. Kraft, P. Kratina, L. Southcott, and D. Schluter. 2012.  
579 Intraguild predation drives evolutionary niche shift in threespine stickleback. *Evolution*  
580 66(6):1819-1832.
- 581 Kaeuffer, R., C.L. Peichel, D.I. Bolnick, and A.P. Hendry. 2012. Parallel and nonparallel  
582 aspects of ecological, phenotypic, and genetic divergence across replicate population pairs of  
583 lake and stream stickleback. *Evolution* 66(2):402-418.
- 584 Karhunen, M., J. Merilä, T. Leinonen, J.M. Cano, and O. Ovaskainen. 2013. driftsel: an R  
585 package for detecting signals of natural selection in quantitative traits. *Molecular Ecology*  
586 *Resources* 13(4):746-754.
- 587 Karhunen, M., O. Ovaskainen, G. Herczeg, and J. Merilä. 2014. Bringing habitat information  
588 into statistical tests of local adaptation in quantitative traits: A case study of nine-spined  
589 sticklebacks. *Evolution* 68(2):559-568.
- 590 Karlsson, J., and P. Byström. 2005. Littoral energy mobilization dominates energy supply for  
591 top consumers in subarctic lakes. *Limnology and Oceanography* 50:538-543.
- 592 Kimmel, C.B., B. Ullmann, C. Walker, C. Wilson, M. Currey, P.C. Phillips, M.A. Bell, J.H.  
593 Postlethwait, and W.A. Cresko. 2005. Evolution and development of facial bone morphology  
594 in threespine sticklebacks. *Proc. Natl. Acad. Sci. USA* 102:5791-5796.
- 595 Kivikoski, M., X. Feng, A. Löytynoja, P. Momigliano, and J. Merilä. Determinants of genetic  
596 diversity in sticklebacks. <https://doi.org/10.1101/2023.03.17.533073>
- 597 Lande, R. 1976. Natural selection and random genetic drift in phenotypic evolution.  
598 *Evolution* 30(2): 314-334.
- 599 Langmead, B., and Salzberg, S. L. 2012. Fast gapped-read alignment with Bowtie 2. *Nature*  
600 *methods* 9(4): 357-359.

- 601 Lavin, P.A. and J.D. McPhail. 1986. Adaptive divergence of trophic phenotype among  
602 freshwater populations of the three-spine stickleback (*Gasterosteus aculeatus*). Can. J. Fish.  
603 Aquat. Sci. 43:2455-2463.
- 604 Le Corre, V. and A. Kremer. 2012. The genetic differentiation at quantitative trait loci under  
605 local adaptation. Molecular Ecology 21(7):1548-1566.
- 606 Leaver, S.D. and T.E. Reimchen. 2012. Abrupt changes in defence and trophic morphology  
607 of the giant threespine stickleback (*Gasterosteus sp.*) following colonization of a vacant  
608 habitat. Biological Journal of the Linnean Society 107(3):494-509.
- 609 Leinonen, T., R.J. McCairns, R.B. O'hara, and J. Merilä. 2013. QST–FST comparisons:  
610 evolutionary and ecological insights from genomic heterogeneity. Nature Reviews Genetics  
611 14(3):179-190.
- 612 Linhart, Y.B. and M.C. Grant. 1996. Evolutionary significance of local genetic differentiation  
613 in plants. Annual Review of Ecology and Systematics 27(1):237-277.
- 614 Lopera-Barrero, N.M., Povh, J.A., Ribeiro, R.P., Gomes, P.C., Jacometo, C.B., and Lopes,  
615 T.D.S. 2008. Comparison of DNA extraction protocols of fish fin and larvae samples:  
616 Modified salt (NaCl) extraction. Ciencia e Investigación Agraria 35(1): 77-86.
- 617 Mallick, S., Gnerre, S., Muller, P., and Reich, D. 2009. The difficulty of avoiding false  
618 positives in genome scans for natural selection. Genome Research 19(5): 922-933.
- 619 Magalhaes, I.S., Whiting, J.R., D'Agostino, D., Hohenlohe, P.A., Mahmud, M., Bell, M.A.,  
620 Skúlason, S., and MacColl, A.D. 2021. Intercontinental genomic parallelism in multiple  
621 three-spined stickleback adaptive radiations. Nature Ecology and Evolution 5(2): 251-261.
- 622 McGee, M.D., and Wainwright, P.C. 2013. Convergent evolution as a generator of  
623 phenotypic diversity in threespine stickleback. Evolution 67: 1204-1208.

- 624 McGee, M.D., D. Schluter, and P.C. Wainwright. 2013. Functional basis of ecological  
625 divergence in sympatric stickleback. *BMC Evolutionary Biology* 13(1):1-10.
- 626 McKay, J.K. and R.G. Latta. 2002. Adaptive population divergence: markers, QTL and traits.  
627 *Trends in Ecology and Evolution* 17:285-291.
- 628 Merilä, J. 2012. Evolution in response to climate change: in pursuit of the missing evidence.  
629 *BioEssays* 34(9):811-818.
- 630 Merilä, J. 2013. Nine-spined stickleback (*Pungitius pungitius*): an emerging model for  
631 evolutionary biology research. *Annals of the New York Academy of Sciences* 1289(1):18-35.
- 632 Merilä, J. and P. Crnokrak. 2001. Comparison of marker gene and quantitative genetic  
633 differentiation among populations. *Journal of Evolutionary Biology* 14:892-903.
- 634 Merilä, J. and A.P. Eloranta. 2017. Cannibalism facilitates gigantism in a nine-spined  
635 stickleback (*Pungitius pungitius*) population. *Ecology of Freshwater Fish* 26(4):686-694.
- 636 Merilä, J. and A.P. Hendry. 2014. Climate change, adaptation, and phenotypic plasticity: the  
637 problem and the evidence. *Evolutionary Applications* 7(1):1-14.
- 638 Momigliano, P., A.B. Florin, and J. Merilä. 2021. Biases in demographic modeling affect our  
639 understanding of recent divergence. *Molecular Biology and Evolution* 38(7):2967-2985.
- 640 Nakagawa, S. and H. Schielzeth. 2010. Repeatability for Gaussian and non-Gaussian data: a  
641 practical guide for biologists. *Biological Reviews* 85(4):935-956.
- 642 Narum, S.R. and J.E. Hess. 2011. Comparison of  $F_{ST}$  outlier tests for SNP loci under  
643 selection. *Molecular Ecology Resources* 11:184-194.
- 644 Nosil, P., D.J. Funk, and D.A.N.I.E.L. Ortiz-Barrientos. 2009. Divergent selection and  
645 heterogeneous genomic divergence. *Molecular Ecology* 18(3):375-402.

- 646 Ovaskainen, O., M. Karhunen, C. Zheng, J.M.C. Arias, and J. Merilä. 2011. A new method to  
647 uncover signatures of divergent and stabilizing selection in quantitative traits. *Genetics*  
648 189(2):621-632.
- 649 Parmesan, C. 2006. Ecological and evolutionary responses to recent climate change. *Annu.*  
650 *Rev. Ecol. Evol. Syst.* 37:637-669.
- 651 R Core Team. 2022. R: A language and environment for statistical computing. R Foundation  
652 for Statistical Computing, Vienna, Austria. URL <https://www.R-project.org/>.
- 653 Raeymaekers, J.A., J.K. Van Houdt, M.H. Larmuseau, S. Geldof, and F.A. Volckaert. 2007.  
654 Divergent selection as revealed by PST and QTL-based FST in three-spined stickleback  
655 (*Gasterosteus aculeatus*) populations along a coastal-inland gradient. *Molecular Ecology*  
656 16(4):891-905.
- 657 Rastas, P., F.C. Calboli, B. Guo, T. Shikano, and J. Merilä. 2016. Construction of ultradense  
658 linkage maps with Lep-MAP2: stickleback F2 recombinant crosses as an example. *Genome*  
659 *Biology and Evolution* 8(1):78-93.
- 660 Ravinet, M., N. Takeuchi, M. Kume, S. Mori, and J. Kitano. 2014. Comparative analysis of  
661 Japanese three-spined stickleback clades reveals the Pacific Ocean lineage has adapted to  
662 freshwater environments while the Japan Sea has not. *PLoS One* 9(12):e112404.
- 663 Rogers, A.R. 1986. Population differences in quantitative characters as opposed to gene  
664 frequencies. *American Naturalist* 127(5):729-730.
- 665 Rohlf, F. J. 2006. tpsDig 2.10. Stony Brook, NY: Department of Ecology and Evolution,  
666 State University of New York.
- 667 Roy, D., K. Lucek, E. Bühler, and O. Seehausen. 2010. Correlating shape variation with  
668 feeding performance to test for adaptive divergence in recently invading stickleback

- 669 populations from Swiss peri-alpine environments. In *Morphometrics for*  
670 *Nonmorphometricians* (pp. 233-257). Springer, Berlin, Heidelberg.
- 671 Rundle, H.D., S.M. Vamosi, and D. Schluter. 2003. Experimental test of predation's effect on  
672 divergent selection during character displacement in sticklebacks. *Proceedings of the*  
673 *National Academy of Sciences* 100(25):14943-14948.
- 674 Savolainen, O., M. Lascoux, and J. Merilä. 2013. Ecological genomics of local adaptation.  
675 *Nature Reviews Genetics* 14(11):807-820.
- 676 Schneider, C.A., W.S. Rasband, and K.W. Eliceiri. 2012. NIH Image to ImageJ: 25 years of  
677 image analysis. *Nature Methods* 9(7):671-675.
- 678 Schluter, D. 2000. Ecological character displacement in adaptive radiation. *American*  
679 *Naturalist* 156:S4-S16.
- 680 Seymour, M., K. Räsänen, and B.K. Kristjánsson. 2019. Drift versus selection as drivers of  
681 phenotypic divergence at small spatial scales: The case of Belgjarskógur threespine  
682 stickleback. *Ecology and Evolution* 9(14):8133-8145.
- 683 Sheridan, J.A. and D. Bickford. 2011. Shrinking body size as an ecological response to  
684 climate change. *Nature Climate Change* 1(8):401-406.
- 685 Shimada, Y., T. Shikano, A. Kuparinen, A. Gonda, T. Leinonen, and J. Merilä. 2011.  
686 Quantitative genetics of body size and timing of maturation in two nine-spined stickleback  
687 (*Pungitius pungitius*) populations. *PLoS One* 6(12):e28859.
- 688 Spitze, K. 1993. Population structure in *Daphnia obtusa*: quantitative genetic and allozymic  
689 variation. *Genetics* 135(2):367-374.

- 690 Stamp, M.A. and J.D. Hadfield. 2020. The relative importance of plasticity versus genetic  
691 differentiation in explaining between population differences; a meta-analysis. *Ecology*  
692 *Letters* 23(10):1432-1441.
- 693 Storz, J.F. 2005. Using genome scans of DNA polymorphism to infer adaptive population  
694 divergence. *Molecular Ecology* 14(3):671-688.
- 695 Tobler, M., M. Palacios, L.J. Chapman, I. Mitrofanov, D. Bierbach, M. Plath, L.  
696 Arias-Rodriguez, F.J. Garcia de Leon, and M. Mateos. 2011. Evolution in extreme  
697 environments: replicated phenotypic differentiation in livebearing fish inhabiting sulfidic  
698 springs. *Evolution* 65(8):2213-2228.
- 699 Østbye, K., C. Harrod, F. Gregersen, T. Klepaker, M. Schulz, D. Schluter, and L.A. Vøllestad.  
700 2016. The temporal window of ecological adaptation in postglacial lakes: a comparison of  
701 head morphology, trophic position and habitat use in Norwegian threespine stickleback  
702 populations. *BMC Evolutionary Biology* 16(1):1-16.
- 703 Voje, K.L., A.B. Mazzeella, T.F. Hansen, K. Østbye, T. Klepaker, A. Bass, A. Herland, K.M.  
704 Bærum, F. Gregersen, and L.A. Vøllestad. 2013. Adaptation and constraint in a stickleback  
705 radiation. *Journal of Evolutionary Biology* 26(11):2396-2414.
- 706 Walker, J.A. and M.A. Bell. 2000. Net evolutionary trajectories of body shape evolution  
707 within a microgeographic radiation of threespine sticklebacks (*Gasterosteus aculeatus*).  
708 *Journal of Zoology* 252:293-302.
- 709 Walther, G.R., E. Post, P. Convey, A. Menzel, C. Parmesan, T.J. Beebee, J.M. Fromentin, O.  
710 Hoegh-Guldberg, and F. Bairlein. 2002. Ecological responses to recent climate change.  
711 *Nature* 416(6879):389-395.
- 712 Whitlock, M.C. 2008. Evolutionary inference from  $Q_{ST}$ . *Molecular Ecology* 17(8):1885-1896.

- 713 Wootton, R.J. 1984. A functional biology of sticklebacks. Croom & Helm, London.
- 714 Wund, M.A., S. Valena, S. Wood, and J.A. Baker. 2012. Ancestral plasticity and allometry in  
715 threespine stickleback reveal phenotypes associated with derived, freshwater ecotypes.  
716 *Biological Journal of the Linnean Society* 105(3):573-583.
- 717 Yi, X., Kemppainen, P., Reid, K., Chen, Y., Rastas, P., Fraimout, A., & Merilä, J. 2023.  
718 Heterogeneous genomic architecture of skeletal armour traits in sticklebacks. bioRxiv,  
719 <https://doi.org/10.1101/2023.05.28.542672>.



720 **TABLES AND FIGURES**

721 **Table 1. Results from the Procrustes ANOVA on head centroid size.** The analysis of  
722 variance (ANOVA) table is shown for the model testing for differences in head centroid size.  
723 Effect: the fixed effect included in the models. Df: degrees of freedom. SS: sums of squares;  
724 MS: mean squares; Rsq: correlation coefficient ( $R^2$ ); F: values from the F-distribution; Z:  
725 effect sizes. *p*: *p*-value with bold font indicating statistical significance ( $p < 0.05$ ).

---

| Effect      | Df  | SS     | MS     | Rsq   | <i>F</i> | <i>Z</i> | <i>p</i>     |
|-------------|-----|--------|--------|-------|----------|----------|--------------|
| Body length | 1   | 14.735 | 14.735 | 0.716 | 3227.578 | 12.631   | <b>0.001</b> |
| Habitat     | 1   | 2.966  | 2.966  | 0.144 | 649.773  | 9.425    | <b>0.001</b> |
| Population  | 6   | 0.157  | 0.026  | 0.007 | 5.737    | 3.975    | <b>0.001</b> |
| Sex         | 1   | 1.424  | 1.424  | 0.055 | 250.226  | 7.018    | <b>0.001</b> |
| Residuals   | 348 | 1.589  | 0.005  | 0.077 |          |          |              |

---

726

727 **Table 2. Results from the Procrustes ANOVA on head shape.** The analysis of variance  
728 (ANOVA) table is shown for the model testing for differences in head shape. Effect: the fixed  
729 effect included in the models with semi-columns indicating interaction. Df: degrees of  
730 freedom. SS: sums of squares; MS: mean squares; Rsq: correlation coefficient ( $R^2$ );  $F$ : values  
731 from the F-distribution;  $Z$ : effect sizes.  $p$ :  $p$ -value with bold font indicating statistical  
732 significance ( $p < 0.05$ ).

---

| Effect             | Df  | SS    | MS    | Rsq   | F      | Z     | $p$          |
|--------------------|-----|-------|-------|-------|--------|-------|--------------|
| Log(Csize)         | 1   | 0.072 | 0.072 | 0.123 | 69.743 | 7.479 | <b>0.001</b> |
| Habitat            | 1   | 0.085 | 0.085 | 0.144 | 81.928 | 7.176 | <b>0.001</b> |
| Population         | 6   | 0.059 | 0.009 | 0.100 | 9.156  | 7.307 | <b>0.001</b> |
| Sex                | 1   | 0.012 | 0.012 | 0.019 | 11.302 | 4.508 | <b>0.001</b> |
| Log(Csize):Habitat | 1   | 0.001 | 0.001 | 0.002 | 1.284  | 0.724 | 0.241        |
| Residuals          | 347 | 0.359 | 0.001 | 0.610 |        |       |              |

---

733

734 **Table 3. Estimates of heritability for head centroid size and head shape.** For each  
735 population, the posterior median of  $h^2$  is shown for head centroid size ( $h^2_{\text{size}}$ ) and the PC1 of  
736 head shape variation ( $h^2_{\text{shape}}$ ) along with their 95% highest posterior density intervals.

---

| Population | $h^2_{\text{size}}$  | $h^2_{\text{shape}}$ |
|------------|----------------------|----------------------|
| SWE-BYN    | 0.466 [0.223; 0.766] | 0.566 [0.393; 0.718] |
| FIN-KRK    | 0.509 [0.168; 0.826] | 0.519 [0.286; 0.778] |
| FIN-PYO    | 0.449 [0.222; 0.723] | 0.543 [0.363; 0.721] |
| FIN-RYT    | 0.389 [0.125; 0.701] | 0.674 [0.538; 0.785] |
| SWE-BOL    | 0.464 [0.221; 0.732] | 0.529 [0.387; 0.655] |
| FIN-RAA    | 0.424 [0.201; 0.682] | 0.630 [0.489; 0.741] |
| FIN-TVA    | 0.504 [0.250; 0.270] | 0.562 [0.439; 0.700] |
| FIN-POR    | 0.499 [0.221; 0.798] | 0.559 [0.415; 0.710] |

---

737

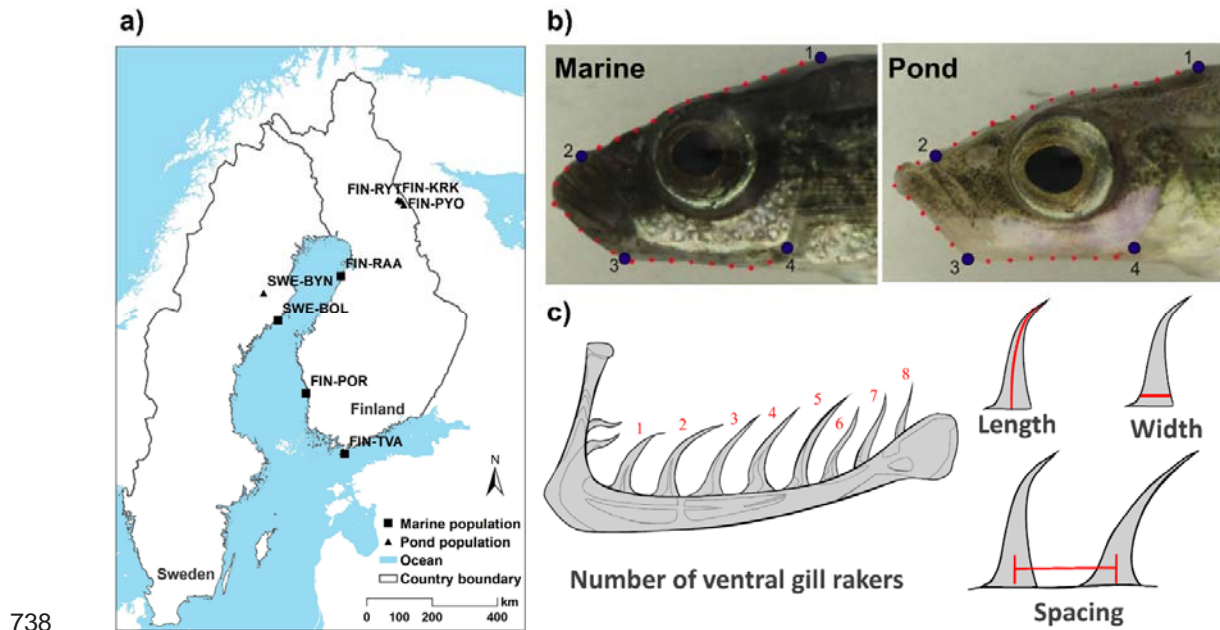

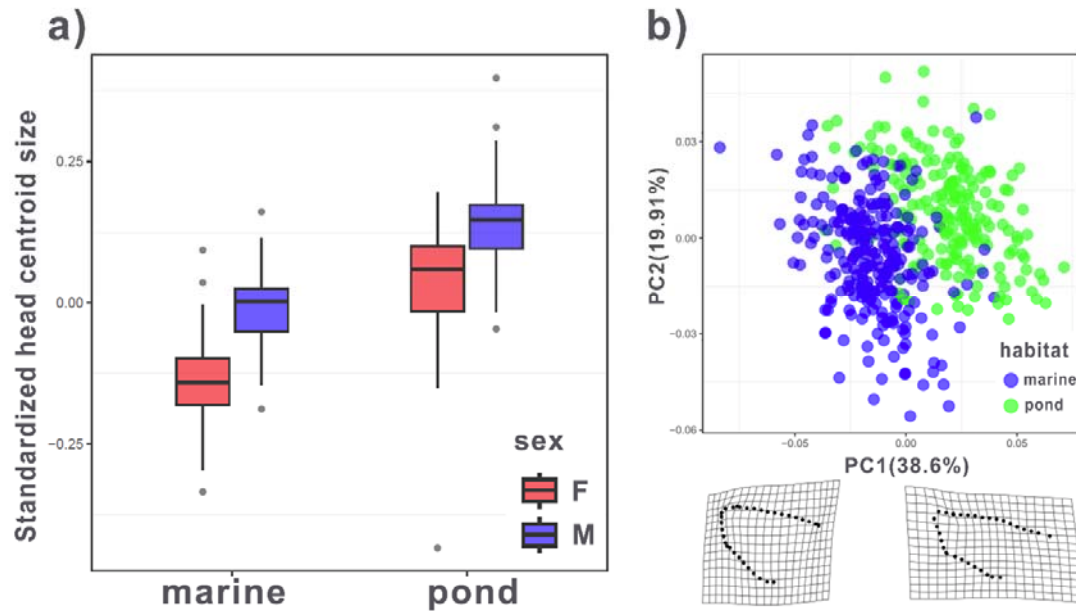

747

748 **Fig. 2.** Head centroid size and shape differentiation. a) The residuals from a regression of  
749 head centroid size on body length were used to describe standardized head size and are  
750 plotted for each habitat (marine or pond) and the two sexes separately (males = M, females =  
751 F). b) Principal component (PC) analysis of head shape variation. Individuals from marine  
752 (blue filled circles) and pond (green filled circles) habitats are plotted along the two first PC  
753 axes. Deformation grids depict the shape change associated with PC1 of head shape variation.

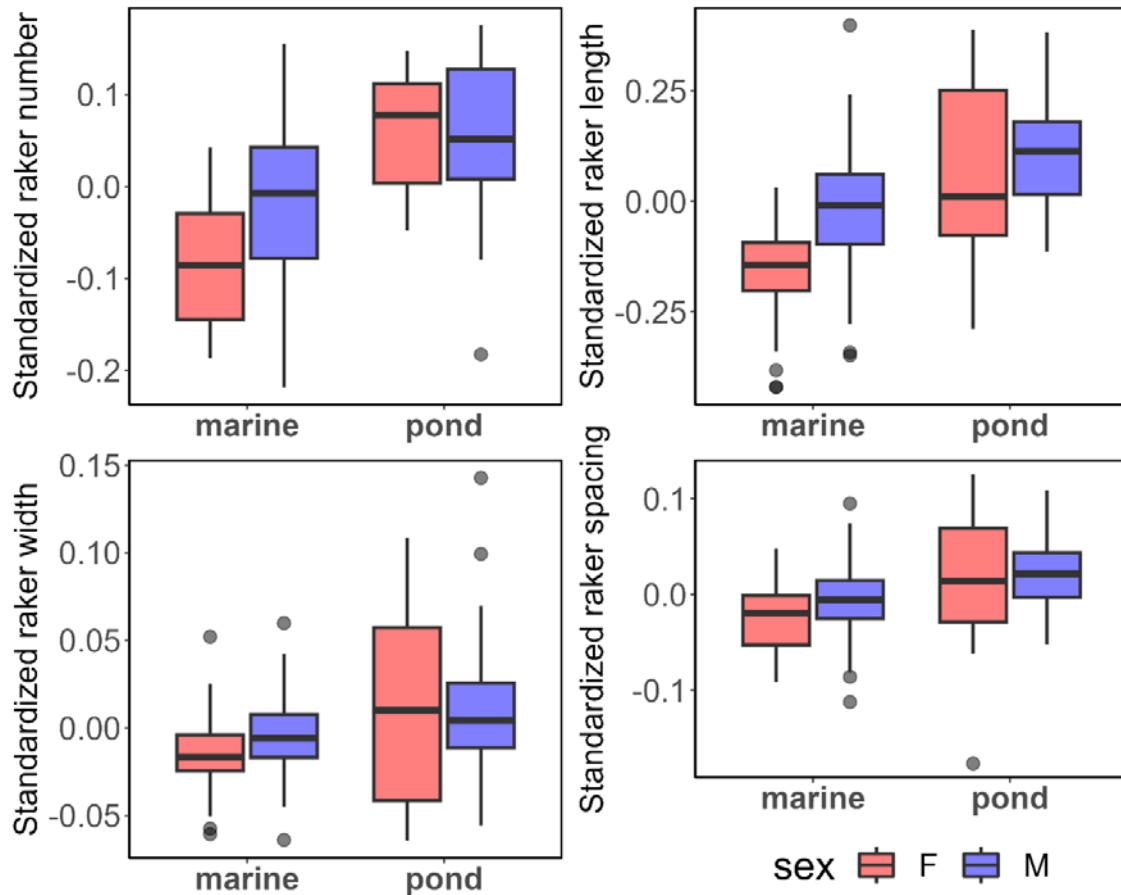

754

755 **Fig. 3.** Differences in mean size standardized values of four raker traits in marine and pond

756 environments, as well as in two sexes (females = F, males = M).

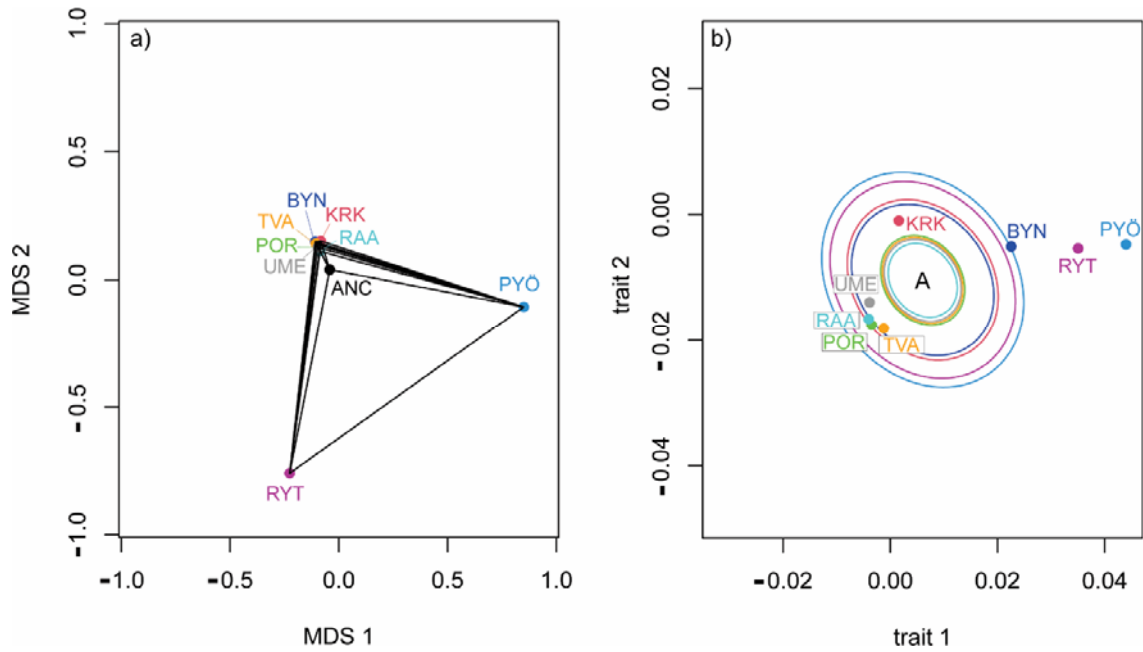

757

758 **Fig. 4.** Results of the driftsel analysis. a) Multidimensional scaling (MDS) patterns of neutral genetic  
759 differentiation estimated from SNP data obtained from the *viz.theta* function in program driftsel. b)  
760 Population means in the trait space from the *viz.trait* function. Ellipses represent the expected median  
761 distance from the inferred ancestral population (ANC) under neutral evolution.
